# Supplementary material
Source: PubMed Central journal article supplement (PMC5739969)
Supplement: NIHMS913956-supplement-supplement_1.pdf [file NIHMS913956-supplement-supplement_1.pdf]

**FIGURE LEGENDS**

Figure 1: Kaplan-Meier survival plots for time to cancer death by metabolic health status, stratified by BMI category.

A – Among participants with normal weight BMI category

B – Among participants with overweight BMI category

C – Among participants with obesity BMI category

**TABLE LEGENDS**

Table 1: Participant characteristics by metabolic health status, stratified by BMI category. Among 22,514 REGARDS participants.

Table 2: Hazard Ratios (HRs) and associated 95% Confidence Intervals for the association between metabolic health status and time to any cancer death, and obesity-related cancer death, stratified by BMI category.

Table 3: Hazard Ratios (HRs) and 95% Confidence Intervals for the association between obesity status and time to any cancer death, stratified by BMI category. Among 766 total cancer deaths, and 2971 competing all-cause deaths.

Table 4: Hazard Ratios (HRs) and 95% Confidence Intervals for the association between obesity status and time to obesity-related cancer death, stratified by BMI category. Among 165 total obesity-related cancer deaths, and 3,572 competing all-cause deaths.

Table 5: Hazard Ratios (HRs) and 95% confidence intervals for the association between components of metabolic health status and time to cancer death and time to obesity-related cancer death stratified by BMI category.

Table S1. Cancer types among 766 participants with cancer deaths in the REGARDS cohort.

**Table S1. Cancer types among 766 participants with cancer deaths in the REGARDS cohort.**

|                        | N (%)      |
|------------------------|------------|
| Total                  | 766        |
| <b>Cancer Type</b>     |            |
| Lung                   | 221 (28.9) |
| Gastro-intestinal      | 150 (19.6) |
| Hematological          | 83 (10.8)  |
| Genitourinary          | 35 (4.6)   |
| Prostate               | 32 (4.2)   |
| Breast                 | 20 (2.6)   |
| Gynecologic            | 20 (2.6)   |
| Central nervous system | 19 (2.5)   |
| Head and neck          | 10 (1.3)   |
| Other/Unknown          | 176 (21.1) |
